# Supplementary material for: Tag SNPs of long non-coding RNA TINCR affect the genetic susceptibility to gastric cancer in a Chinese population
Source: PubMed Central journal article supplement (PMC5349975; doi:10.18632/oncotarget.13513), 2015-11-23
Supplement: oncotarget-07-87114-s001.pdf [file oncotarget-07-87114-s001.pdf]

## Tag SNPs of long non-coding RNA TINCR affect the genetic susceptibility to gastric cancer in a Chinese population

### SUPPLEMENTARY FIGURE AND TABLE

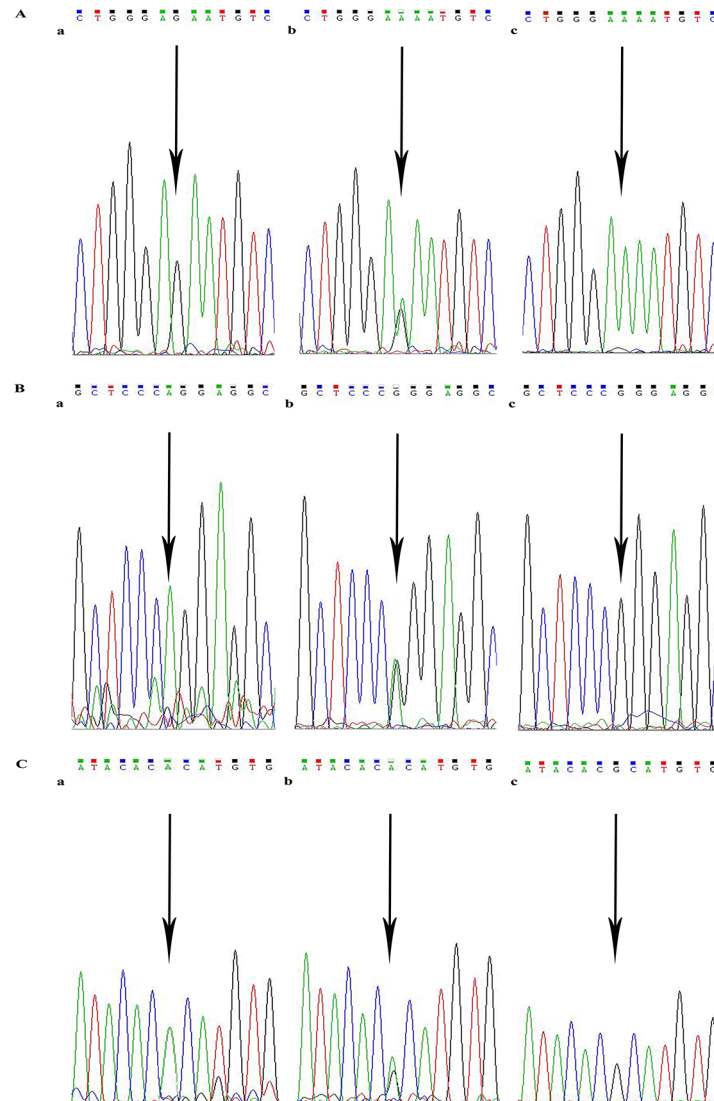

**Supplementary Figure S1: Direct sequencing results for the tag SNPs of long non-coding RNA TINCR.** The polymorphisms were detected by TaqMan technology and confirmed by direct polymerase chain reaction sequencing (except the rs8105637, for the technical reasons). The single base indicated by a black arrowhead is the site of the small nucleotide polymorphism. **A.** Representative DNA sequencing results of rs8113645: (a) GG, (b) GA and (c) AA genotypes; **B.** Representative DNA sequencing results of rs2288947: (a) AA, (b) AG and (c) GG genotypes; **C.** Representative DNA sequencing results of rs12610531: (a) AA, (b) AG and (c) GG genotypes.

Supplementary Table S1: Information of primers and probes

| SNPs              | Primer sequence(5'-3')      | Probe sequence                        |
|-------------------|-----------------------------|---------------------------------------|
| rs8113645<br>G>A  | F-CCAGGGCTGTTCACTGCACAAAGG  | T:FAM-CCCAGGACATTTTCCCAGCCACACC-MGB   |
|                   | R-AGCCAGAGGGCATCGCAAGAAG    | C:HEX-CCCAGGACATTCTCCCAGCCACACC-MGB   |
| rs2288947<br>A>G  | F-AGTGTATGGAGGGGGATGATGGT   | T:FAM-CTCCTGCCTCCTGGGAGCCTAGATC-MGB   |
|                   | R-GAATAGGCTGGGGTAGAGGGCA    | C:HEX-CTCCTGCCTCCCGGGAGCCTAGATC-MGB   |
| rs8105637<br>A>G  | F-GACAGAGCTTCAGAGACAGAGAAAA | A:FAM-CAGAGACACCAGAGAG-MGB            |
|                   | R-TCTCTGTTATTTTGGTCTCTGCTCT | G: HEX-CAGAGACACCGGAGAG-MGB           |
| rs12610531<br>A>G | F-GGCATGGAGTAAGGACCAAGGAA   | T:FAM-GGGCCACATGTGTGTATCTAGAGCCTG-MGB |
|                   | R-AGGCCCAAGGAGGTTGTCAGG     | C:HEX-GGGCCACATGCGTGTATCTAGAGCCTG-MGB |
